# Supplementary material for: Neurostimulation in People with Oropharyngeal Dysphagia: A Systematic Review and Meta-Analyses of Randomised Controlled Trials—Part I: Pharyngeal and Neuromuscular Electrical Stimulation
Source: MDPI journal article supplement (doi:10.3390/jcm11030776), 2022-01-31
Supplement: s1 [file s1]

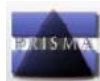

**PRISMA 2020 for Abstracts Checklist: Neurostimulation in people with oropharyngeal dysphagia: a systematic review and meta-analyses of randomised controlled trials. Part I: Pharyngeal and neuromuscular electrical stimulation**

| Section and Topic       | Item # | Checklist item                                                                                                                                                                                                                                                                                        | Reported (Yes/No)                                            |
|-------------------------|--------|-------------------------------------------------------------------------------------------------------------------------------------------------------------------------------------------------------------------------------------------------------------------------------------------------------|--------------------------------------------------------------|
| <b>TITLE</b>            |        |                                                                                                                                                                                                                                                                                                       |                                                              |
| Title                   | 1      | Identify the report as a systematic review.                                                                                                                                                                                                                                                           | Yes                                                          |
| <b>BACKGROUND</b>       |        |                                                                                                                                                                                                                                                                                                       |                                                              |
| Objectives              | 2      | Provide an explicit statement of the main objective(s) or question(s) the review addresses.                                                                                                                                                                                                           | Yes                                                          |
| <b>METHODS</b>          |        |                                                                                                                                                                                                                                                                                                       |                                                              |
| Eligibility criteria    | 3      | Specify the inclusion and exclusion criteria for the review.                                                                                                                                                                                                                                          | No                                                           |
| Information sources     | 4      | Specify the information sources (e.g. databases, registers) used to identify studies and the date when each was last searched.                                                                                                                                                                        | Yes – sources<br>No - date                                   |
| Risk of bias            | 5      | Specify the methods used to assess risk of bias in the included studies.                                                                                                                                                                                                                              | Yes                                                          |
| Synthesis of results    | 6      | Specify the methods used to present and synthesise results.                                                                                                                                                                                                                                           | Yes                                                          |
| <b>RESULTS</b>          |        |                                                                                                                                                                                                                                                                                                       |                                                              |
| Included studies        | 7      | Give the total number of included studies and participants and summarise relevant characteristics of studies.                                                                                                                                                                                         | Yes – studies<br>No - participants                           |
| Synthesis of results    | 8      | Present results for main outcomes, preferably indicating the number of included studies and participants for each. If meta-analysis was done, report the summary estimate and confidence/credible interval. If comparing groups, indicate the direction of the effect (i.e. which group is favoured). | Yes – results & direction of effect<br>No – summary estimate |
| <b>DISCUSSION</b>       |        |                                                                                                                                                                                                                                                                                                       |                                                              |
| Limitations of evidence | 9      | Provide a brief summary of the limitations of the evidence included in the review (e.g. study risk of bias, inconsistency and imprecision).                                                                                                                                                           | Yes                                                          |
| Interpretation          | 10     | Provide a general interpretation of the results and important implications.                                                                                                                                                                                                                           | Yes                                                          |
| <b>OTHER</b>            |        |                                                                                                                                                                                                                                                                                                       |                                                              |
| Funding                 | 11     | Specify the primary source of funding for the review.                                                                                                                                                                                                                                                 | N/A                                                          |
| Registration            | 12     | Provide the register name and registration number.                                                                                                                                                                                                                                                    | No (see main manuscript)                                     |

From: Page MJ, McKenzie JE, Bossuyt PM, Boutron I, Hoffmann TC, Mulrow CD, et al. The PRISMA 2020 statement: an updated guideline for reporting systematic reviews. BMJ 2021;372:n71. doi: 10.1136/bmj.n71

For more information, visit: <http://www.prisma-statement.org/>
